# Supplementary material for: Exploring the Nature of Silicon-Noble Gas Bonds in H3SiNgNSi and HSiNgNSi Compounds (Ng = Xe, Rn)
Source: PubMed Central journal article supplement (PMC4394539; doi:10.3390/ijms16036402), 2015-03-19
Supplement: ijms-16-06402-s001.pdf [file ijms-16-06402-s001.pdf]

## Supplementary Information

**Table S1.** The geometrical parameters (in Å and degrees) of the optimized geometries of H<sub>3</sub>SiNgNSi and HSiNgNSi compounds (both minimum energy structures and transition states) studied at the  $\omega$ B97X-D/def2-QZVPPD and CCSD(T)/def2-TZVP levels.

| Nature of Stationary Points | Compounds              | r <sub>H-Si</sub> | r <sub>Si-Ng</sub> | r <sub>Ng-N</sub> | r <sub>N-Si</sub> | <H-Si-Ng | <Si-Ng-N | <Ng-N-Si |
|-----------------------------|------------------------|-------------------|--------------------|-------------------|-------------------|----------|----------|----------|
| $\omega$ B97X-D             | H <sub>3</sub> SiXeNSi | 1.475             | 2.586              | 2.353             | 1.561             | 107.4    | 180.0    | 180.0    |
| Minimum                     | H <sub>3</sub> SiRnNSi | 1.476             | 2.692              | 2.398             | 1.560             | 108.2    | 180.0    | 180.0    |
| Energy                      | HSiXeNSi               | 1.516             | 2.634              | 2.409             | 1.562             | 90.0     | 180.0    | 179.1    |
|                             | HSiRnNSi               | 1.517             | 2.739              | 2.452             | 1.562             | 90.2     | 179.8    | 179.9    |
| CCSD(T)                     | H <sub>3</sub> SiXeNSi | 1.478             | 2.637              | 2.365             | 1.585             | 107.2    | 180.0    | 180.0    |
| Minimum                     | H <sub>3</sub> SiRnNSi | 1.479             | 2.727              | 2.404             | 1.583             | 108.0    | 180.0    | 180.0    |
| Energy                      | HSiXeNSi               | 1.517             | 2.719              | 2.414             | 1.586             | 89.5     | 179.9    | 179.5    |
|                             | HSiRnNSi               | 1.517             | 2.796              | 2.448             | 1.585             | 89.9     | 180.0    | 180.0    |

**Table S2.** The geometrical parameters (in Å and degrees) of the optimized geometries of H<sub>3</sub>SiNSi and HSiNSi compounds obtained at the MP2/def2-QZVPPD and  $\omega$ B97X-D/def2-QZVPPD levels.

| Levels          | Compounds            | r <sub>H-Si</sub> | r <sub>Si-N</sub> | r <sub>N-Si</sub> | <HSiN | <SiNSi |
|-----------------|----------------------|-------------------|-------------------|-------------------|-------|--------|
| MP2             | H <sub>3</sub> SiNSi | 1.475             | 1.723             | 1.575             | 110.0 | 180.0  |
|                 | HSiNSi               | 1.519             | 1.724             | 1.589             | 96.6  | 171.4  |
| $\omega$ B97X-D | H <sub>3</sub> SiNSi | 1.482             | 1.708             | 1.554             | 110.6 | 180.0  |
|                 | HSiNSi               | 1.531             | 1.705             | 1.567             | 97.3  | 171.6  |

**Table S3.** Free energy change ( $\Delta G$ , kcal/mol) at 298 K for different dissociation channels of H<sub>3</sub>SiNgNSi and HSiNgNSi compounds at the MP2/def2-QZVPPD level.

| Processes                                                                                    | $\Delta G$ |        | Processes                                                       | $\Delta G$ |        |
|----------------------------------------------------------------------------------------------|------------|--------|-----------------------------------------------------------------|------------|--------|
|                                                                                              | Xe         | Rn     |                                                                 | Xe         | Rn     |
| H <sub>3</sub> SiNgNSi $\rightarrow$ H <sub>3</sub> SiNg <sup>+</sup> + NSi <sup>-</sup>     | 209.0      | 110.5  | HSiNgNSi $\rightarrow$ HSiNg <sup>+</sup> + NSi <sup>-</sup>    | 204.0      | 105.0  |
| H <sub>3</sub> SiNgNSi $\rightarrow$ H <sub>3</sub> Si <sup>-</sup> + NgNSi <sup>+</sup>     | 286.0      | 181.3  | HSiNgNSi $\rightarrow$ HSiNg + NSi                              | 129.1      | 32.9   |
| H <sub>3</sub> SiNgNSi $\rightarrow$ H <sub>3</sub> Si <sup>-</sup> + NSiNg <sup>+</sup>     | 312.7      | 209.2  | HSiNgNSi $\rightarrow$ HSi <sup>-</sup> + NSiNg <sup>+</sup>    | 308.8      | 204.7  |
| H <sub>3</sub> SiNgNSi $\rightarrow$ H <sub>3</sub> SiNSi + Ng                               | -6.7       | -101.2 | HSiNgNSi $\rightarrow$ HSi <sup>-</sup> + NgNSi <sup>+</sup>    | 282.1      | 176.9  |
| H <sub>3</sub> SiNgNSi $\rightarrow$ H <sub>3</sub> Si + Ng + NSi                            | 131.8      | 37.3   | HSiNgNSi $\rightarrow$ HSiNSi + Ng                              | -7.0       | -102.1 |
| H <sub>3</sub> SiNgNSi $\rightarrow$ H <sub>3</sub> Si <sup>+</sup> + Ng + NSi <sup>-</sup>  | 226.4      | 131.8  | HSiNgNSi $\rightarrow$ HSi + Ng + NSi                           | 127.5      | 32.4   |
| H <sub>3</sub> SiNgNSi $\rightarrow$ H <sub>3</sub> Si <sup>-</sup> + Ng + NSi <sup>+</sup>  | 337.5      | 242.9  | HSiNgNSi $\rightarrow$ HSi <sup>+</sup> + Ng + NSi <sup>-</sup> | 217.4      | 122.3  |
| H <sub>3</sub> SiNgNSi $\rightarrow$ H <sub>2</sub> Si + NgH + NSi                           | 196.6      | 102.0  | HSiNgNSi $\rightarrow$ HSi <sup>-</sup> + Ng + NSi <sup>+</sup> | 333.5      | 238.4  |
| H <sub>3</sub> SiNgNSi $\rightarrow$ H <sub>2</sub> Si <sup>+</sup> + NgH + NSi <sup>-</sup> | 310.1      | 215.4  | HSiNgNSi $\rightarrow$ Si + NgH + NSi                           | 220.1      | 124.9  |
| H <sub>3</sub> SiNgNSi $\rightarrow$ H <sub>2</sub> Si <sup>-</sup> + NgH + NSi <sup>+</sup> | 406.4      | 311.7  | HSiNgNSi $\rightarrow$ Si + NgH <sup>+</sup> + NSi <sup>-</sup> | 329.0      | 227.0  |
| H <sub>3</sub> SiNgNSi $\rightarrow$ H <sub>2</sub> Si + NgH <sup>+</sup> + NSi <sup>-</sup> | 305.5      | 204.1  | $\Delta G^{\ddagger a}$                                         | 10.6       | 13.5   |
| H <sub>3</sub> SiNgNSi $\rightarrow$ H <sub>2</sub> Si <sup>-</sup> + NgH <sup>+</sup> + NSi | 372.9      | 271.4  | -                                                               | -          | -      |
| H <sub>3</sub> SiNgNSi $\rightarrow$ HSi + HNgH + NSi                                        | 286.0      | 181.5  | -                                                               | -          | -      |
| H <sub>3</sub> SiNgNSi $\rightarrow$ HSi <sup>+</sup> + HNgH + NSi <sup>-</sup>              | 375.9      | 271.4  | -                                                               | -          | -      |
| H <sub>3</sub> SiNgNSi $\rightarrow$ HSi <sup>-</sup> + HNgH + NSi <sup>+</sup>              | 492.1      | 387.5  | -                                                               | -          | -      |
| $\Delta G^{\ddagger a}$                                                                      | 19.1       | 22.9   | -                                                               | -          | -      |

$\Delta G^{\ddagger a}$  is the activation free energy barrier for the processes, H<sub>3</sub>SiNgNSi  $\rightarrow$  H<sub>3</sub>SiNSi + Ng and HSiNgNSi  $\rightarrow$  HSiNSi + Ng.

**Table S4.** Zero point energy-corrected dissociation energy ( $D_0$ , kcal/mol) and dissociation enthalpy at 298 K ( $\Delta H$ , kcal/mol) for different dissociation channels of  $H_3SiNgNSi$  and  $HSiNgNSi$  compounds at the MP2/def2-QZVPPD level.

| Processes                                      | $D_0$ |       | $\Delta H$ |       | Processes                                 | $D_0$ |       | $\Delta H$ |       |
|------------------------------------------------|-------|-------|------------|-------|-------------------------------------------|-------|-------|------------|-------|
|                                                | Xe    | Rn    | Xe         | Rn    |                                           | Xe    | Rn    | Xe         | Rn    |
| $H_3SiNgNSi \rightarrow H_3SiNg^+ + NSi^-$     | 217.7 | 119.3 | 217.5      | 119.1 | $HSiNgNSi \rightarrow HSiNg^+ + NSi^-$    | 212.2 | 113.4 | 212.0      | 113.1 |
| $H_3SiNgNSi \rightarrow H_3Si^- + NgNSi^+$     | 294.4 | 189.9 | 294.7      | 190.0 | $HSiNgNSi \rightarrow HSiNg + NSi$        | 138.5 | 42.5  | 138.4      | 42.4  |
| $H_3SiNgNSi \rightarrow H_3Si^- + NSiNg^+$     | 320.3 | 216.9 | 319.9      | 216.5 | $HSiNgNSi \rightarrow HSi^- + NSiNg^+$    | 314.8 | 211.0 | 314.3      | 210.5 |
| $H_3SiNgNSi \rightarrow H_3SiNSi + Ng$         | -0.6  | -95.1 | -0.9       | -95.4 | $HSiNgNSi \rightarrow HSi^- + NgNSi^+$    | 288.9 | 183.9 | 289.0      | 184.0 |
| $H_3SiNgNSi \rightarrow H_3Si + Ng + NSi$      | 147.8 | 53.3  | 148.5      | 54.0  | $HSiNgNSi \rightarrow HSiNSi + Ng$        | -1.5  | -96.3 | -1.7       | -96.6 |
| $H_3SiNgNSi \rightarrow H_3Si^+ + Ng + NSi^-$  | 241.1 | 146.6 | 241.8      | 147.3 | $HSiNgNSi \rightarrow HSi + Ng + NSi$     | 141.3 | 46.4  | 141.8      | 46.9  |
| $H_3SiNgNSi \rightarrow H_3Si^+ + Ng + NSi^+$  | 353.4 | 258.9 | 354.1      | 259.6 | $HSiNgNSi \rightarrow HSi^+ + Ng + NSi^-$ | 230.4 | 135.5 | 231.0      | 136.1 |
| $H_3SiNgNSi \rightarrow H_2Si + NgH + NSi$     | 216.3 | 121.8 | 218.1      | 123.5 | $HSiNgNSi \rightarrow HSi^- + Ng + NSi^+$ | 347.9 | 253.0 | 348.5      | 253.6 |
| $H_3SiNgNSi \rightarrow H_2Si^+ + NgH + NSi^-$ | 329.8 | 235.2 | 331.6      | 237.0 | $HSiNgNSi \rightarrow Si + NgH + NSi$     | 235.8 | 140.9 | 236.9      | 142.0 |
| $H_3SiNgNSi \rightarrow H_2Si^- + NgH + NSi^+$ | 426.9 | 332.4 | 428.7      | 334.1 | $HSiNgNSi \rightarrow Si + NgH^+ + NSi^-$ | 342.1 | 240.4 | 342.6      | 240.9 |
| $H_3SiNgNSi \rightarrow H_2Si + NgH^+ + NSi^-$ | 322.6 | 221.2 | 323.9      | 222.5 | $\Delta E^\ddagger$                       | 10.5  | 13.6  | -          | -     |
| $H_3SiNgNSi \rightarrow H_2Si^- + NgH^+ + NSi$ | 390.7 | 289.4 | 392.0      | 290.6 | -                                         | -     | -     | -          | -     |
| $H_3SiNgNSi \rightarrow HSi + HNgH + NSi$      | 302.9 | 189.5 | 304.0      | 199.5 | -                                         | -     | -     | -          | -     |
| $H_3SiNgNSi \rightarrow HSi^+ + HNgH + NSi^-$  | 392.0 | 287.6 | 393.1      | 288.7 | -                                         | -     | -     | -          | -     |
| $H_3SiNgNSi \rightarrow HSi^- + HNgH + NSi^+$  | 509.5 | 405.1 | 510.6      | 406.2 | -                                         | -     | -     | -          | -     |
| $\Delta E^\ddagger$                            | 19.7  | 23.7  | -          | -     | -                                         | -     | -     | -          | -     |

$\Delta E^\ddagger$  is the activation energy barrier for the processes,  $H_3SiNgNSi \rightarrow H_3SiNSi + Ng$  and  $HSiNgNSi \rightarrow HSiNSi + Ng$ .

**Table S5.** Zero point energy corrected dissociation energy ( $D_0$ , kcal/mol) and dissociation enthalpy at 298 K ( $\Delta H$ , kcal/mol) for different dissociation channels of  $H_3SiNgNSi$  and  $HSiNgNSi$  compounds at the  $\omega B97X-D/def2-QZVPPD$  level.

| Processes                                      | $D_0$  |        | $\Delta H$ |        | Processes                                 | $D_0$  |        | $\Delta H$ |        |
|------------------------------------------------|--------|--------|------------|--------|-------------------------------------------|--------|--------|------------|--------|
|                                                | Xe     | Rn     | Xe         | Rn     |                                           | Xe     | Rn     | Xe         | Rn     |
| $H_3SiNgNSi \rightarrow H_3SiNg^+ + NSi^-$     | 114.4  | 119.9  | 114.3      | 119.8  | $HSiNgNSi \rightarrow HSiNg^+ + NSi^-$    | 107.9  | 112.7  | 107.7      | 112.5  |
| $H_3SiNgNSi \rightarrow H_3Si^- + NgNSi^+$     | 174.0  | 175.0  | 174.4      | 175.4  | $HSiNgNSi \rightarrow HSiNg + NSi$        | 6.6    | 14.1   | 6.7        | 14.2   |
| $H_3SiNgNSi \rightarrow H_3SiNSi + Ng$         | -112.9 | -104.1 | -113.2     | -104.3 | $HSiNgNSi \rightarrow HSi^- + NgNSi^+$    | 171.1  | 171.4  | 171.2      | 171.6  |
| $H_3SiNgNSi \rightarrow H_3Si + Ng + NSi$      | 16.2   | 25.1   | 17.0       | 25.9   | $HSiNgNSi \rightarrow HSiNSi + Ng$        | -115.1 | -106.8 | -115.3     | -107.1 |
| $H_3SiNgNSi \rightarrow H_3Si^+ + Ng + NSi^-$  | 137.1  | 146.0  | 137.9      | 146.8  | $HSiNgNSi \rightarrow HSi + Ng + NSi$     | 8.6    | 16.9   | 9.2        | 17.5   |
| $H_3SiNgNSi \rightarrow H_3Si^- + Ng + NSi^+$  | 217.9  | 226.8  | 218.7      | 227.6  | $HSiNgNSi \rightarrow HSi^+ + Ng + NSi^-$ | 126.5  | 134.7  | 127.1      | 135.3  |
| $H_3SiNgNSi \rightarrow H_2Si + NgH + NSi$     | 85.2   | 94.1   | 87.1       | 95.9   | $HSiNgNSi \rightarrow HSi^- + Ng + NSi^+$ | 214.9  | 223.2  | 215.6      | 223.8  |
| $H_3SiNgNSi \rightarrow H_2Si^+ + NgH + NSi^-$ | 227.3  | 236.1  | 229.2      | 238.0  | $HSiNgNSi \rightarrow Si + NgH + NSi$     | 104.7  | 113.0  | 105.9      | 114.1  |
| $H_3SiNgNSi \rightarrow H_2Si^- + NgH + NSi^+$ | 293.5  | 302.4  | 295.4      | 304.3  | $HSiNgNSi \rightarrow Si + NgH^+ + NSi^-$ | 233.9  | 235.7  | 234.5      | 236.3  |
| $H_3SiNgNSi \rightarrow H_2Si + NgH^+ + NSi^-$ | 214.3  | 216.7  | 215.7      | 218.0  | $\Delta E^\ddagger$                       | 9.5    | 12.8   | -          | -      |
| $H_3SiNgNSi \rightarrow H_2Si^- + NgH^+ + NSi$ | 255.2  | 257.6  | 256.5      | 258.9  | -                                         | -      | -      | -          | -      |
| $H_3SiNgNSi \rightarrow HSi + HNgH + NSi$      | 166.7  | 167.2  | 167.8      | 168.3  | -                                         | -      | -      | -          | -      |
| $H_3SiNgNSi \rightarrow HSi^+ + HNgH + NSi^-$  | 284.6  | 285.0  | 285.7      | 286.2  | -                                         | -      | -      | -          | -      |
| $H_3SiNgNSi \rightarrow HSi^- + HNgH + NSi^+$  | 373.0  | 373.5  | 374.1      | 374.6  | -                                         | -      | -      | -          | -      |
| $\Delta E^\ddagger$                            | 21.2   | 25.1   | -          | -      | -                                         | -      | -      | -          | -      |

$\Delta E^\ddagger$  is the activation energy barrier for the processes,  $H_3SiNgNSi \rightarrow H_3SiNSi + Ng$  and  $HSiNgNSi \rightarrow HSiNSi + Ng$ .
